# Supplementary material
Source: Springer Nature journal article supplement (https://www.springermedizin.de/resource/supplementary/12933_2005_38_MOESM2_ESM.pdf/9539486)

**INJURIOUS STIMULI**

**INTIMAL REDOX STRESS = ROS** \* URIC ACID  
 Bacterial Insults (Nanobacteria)?  
 Viral Insults CMV - HSV-1  
 Infection Hemodynamic Stress  
 \* hs CRP

**RESPONSE**

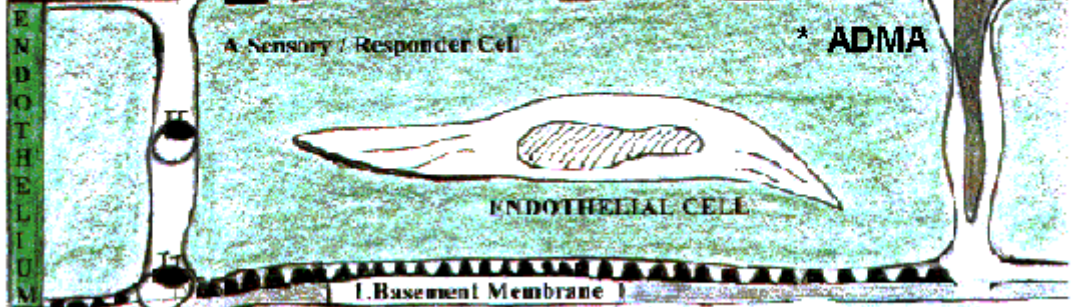

**ADAPTIVE CHANGES**

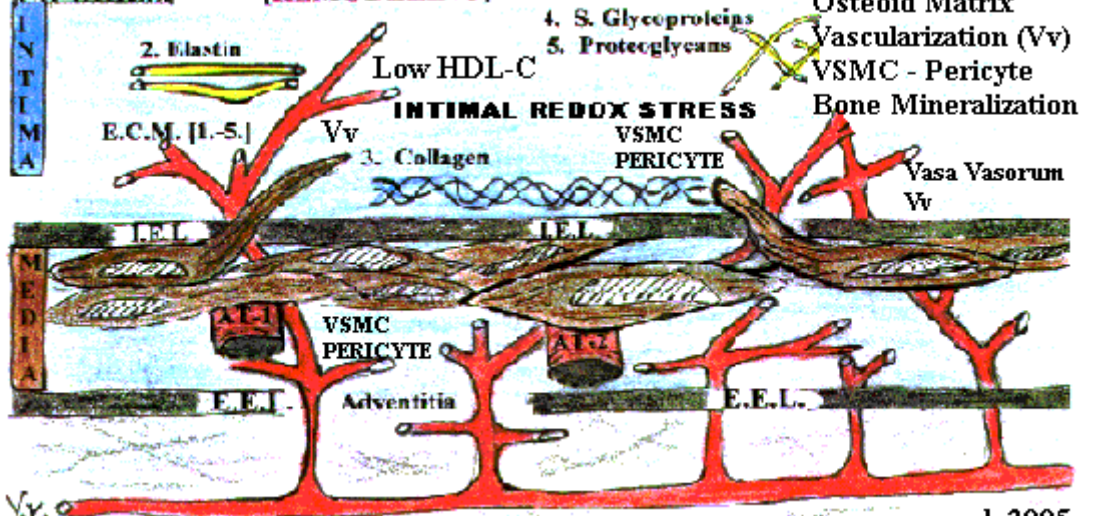

Supplement: MOESM2 [file 9539486]
